# Supplementary material for: Leaf litter identity rather than diversity shapes microbial functions and microarthropod abundance in tropical montane rainforests
Source: PubMed Central journal article supplement (PMC7920764; doi:10.1002/ece3.7208), 2021-01-29
Supplement: ECE3-11-2360-s001.pdf [file ECE3-11-2360-s001.pdf]

RAW DATASET

P: *Dictyocaryum lamarekianum*  
 G: *Graffenrieda emarginata*  
 A: *Cecropia andina*

C: *Clusia* spp.  
 V: *Cavendishia zamorensis*  
 M: *Myrcia pubescens*

| Date     | Diversity | Block | Littertype | Mloss | Oribatida ab | Collembola ab | Prostigmata ab | Mesostigmata ab | BR       | Cmic    | Slope  | qO2     | C          | N         | C-toN    |
|----------|-----------|-------|------------|-------|--------------|---------------|----------------|-----------------|----------|---------|--------|---------|------------|-----------|----------|
| 6 months | 1         | 1     | P          | 24,01 | 16           | 26            | 4              | 18              | 88,8566  | 6,1355  | 0,0040 | 14,4823 | 48,81871   | 0,856215  | 57,01688 |
| 6 months | 1         | 2     | P          | 29,54 | 56           | 22            | 10             | 28              | 121,5838 | 6,8422  | 0,0041 | 17,7697 | 49,339333  | 1,099444  | 44,87662 |
| 6 months | 1         | 3     | P          | 23,89 | 34           | 10            | 6              | 14              | 122,2446 | 7,8793  | 0,0018 | 15,5147 | 49,074875  | 1,24391   | 39,45211 |
| 6 months | 1         | 4     | P          | 26,31 | 4            | 8             | 6              | 24              | 109,3046 | 7,4537  | 0,0040 | 14,6645 | 49,376293  | 0,949986  | 51,97581 |
| 6 months | 1         | 1     | G          | 38,01 | 166          | 36            | 26             | 40              | 116,1864 | 10,8034 | 0,0049 | 10,7547 | 48,185871  | 1,089749  | 44,2174  |
| 6 months | 1         | 2     | G          | 38,89 | 34           | 30            | 12             | 8               | 110,4195 | 9,2846  | 0,0031 | 11,8928 | 47,505066  | 1,342642  | 35,38178 |
| 6 months | 1         | 3     | G          | 51,61 | 94           | 46            | 22             | 52              | 102,4573 | 9,5708  | 0,0050 | 10,7052 | 47,468388  | 1,061218  | 44,7301  |
| 6 months | 1         | 1     | A          | 27,68 | 18           | 42            | 20             | 22              | 81,6050  | 10,6535 | 0,0000 | 7,6599  | 42,137314  | 1,688045  | 24,9622  |
| 6 months | 1         | 2     | A          | 27,94 | 62           | 78            | 36             | 42              | 84,9011  | 7,4896  | 0,0000 | 11,3359 | 43,351112  | 1,404862  | 30,85791 |
| 6 months | 1         | 3     | A          | 28,87 | 50           | 48            | 32             | 64              | 88,6533  | 9,9545  | 0,0000 | 8,9059  | 41,795208  | 1,938895  | 21,5562  |
| 6 months | 1         | 1     | C          | 31,49 | 34           | 32            | 8              | 8               | 55,8632  | 5,2371  | 0,0082 | 10,6668 | 51,361385  | 0,747568  | 68,70463 |
| 6 months | 1         | 2     | C          | 30,97 | 118          | 58            | 28             | 12              | 56,2142  | 5,1650  | 0,0080 | 10,8836 | 49,337646  | 0,594274  | 83,02171 |
| 6 months | 1         | 3     | C          | 31,05 | 106          | 28            | 16             | 18              | 91,7219  | 6,3948  | 0,0073 | 14,3433 | 49,909821  | 0,627232  | 79,57155 |
| 6 months | 1         | 1     | V          | 27,77 | 54           | 18            | 8              | 16              | 100,7718 | 7,7420  | 0,0044 | 13,0162 | 49,843433  | 0,753191  | 66,17635 |
| 6 months | 1         | 2     | V          | 30,60 | 122          | 34            | 12             | 14              | 103,3333 | 8,7780  | 0,0040 | 11,7719 | 48,884365  | 1,041886  | 46,91911 |
| 6 months | 1         | 3     | V          | 29,85 | 16           | 4             | 12             | 4               | 118,6388 | 10,5590 | 0,0053 | 11,2358 | 49,419205  | 1,253915  | 39,41193 |
| 6 months | 1         | 4     | V          | 25,61 | 30           | 10            | 6              | 12              | 91,9918  | 7,0752  | 0,0000 | 13,0020 | 49,242031  | 0,794519  | 61,97716 |
| 6 months | 1         | 1     | M          | 19,55 | 128          | 14            | 4              | 8               | 95,4210  | 6,1242  | 0,0101 | 15,5810 | 45,993355  | 1,006596  | 45,99197 |
| 6 months | 1         | 2     | M          | 21,19 | 68           | 28            | 14             | 18              | 77,3440  | 5,2188  | 0,0059 | 14,8203 | 47,278255  | 0,852194  | 55,47828 |
| 6 months | 1         | 3     | M          | 27,16 | 32           | 6             | 6              | 6               | 103,9684 | 7,3870  | 0,0100 | 14,0745 | 46,400116  | 1,008363  | 46,01529 |
| 6 months | 2         | 1     | PG         | 41,02 | 22           | 34            | 26             | 4               | 128,3906 | 8,4370  | 0,0046 | 15,2177 | 48,5022905 | 0,972982  | 49,84911 |
| 6 months | 2         | 2     | PG         | 45,64 | 84           | 14            | 8              | 14              | 133,8526 | 8,4605  | 0,0000 | 15,8208 | 48,4221995 | 1,221043  | 39,65642 |
| 6 months | 2         | 3     | PG         | 40,21 | 82           | 48            | 30             | 58              | 139,6497 | 10,5170 | 0,0052 | 13,2785 | 48,2716315 | 1,152564  | 41,88195 |
| 6 months | 2         | 1     | PA         | 44,24 | 60           | 74            | 38             | 74              | 85,1699  | 6,2049  | 0,0024 | 13,7262 | 45,478012  | 1,27213   | 35,7495  |
| 6 months | 2         | 2     | PA         | 39,23 | 128          | 68            | 8              | 80              | 105,7843 | 8,1963  | 0,0065 | 12,9064 | 46,3452225 | 1,252153  | 37,01243 |
| 6 months | 2         | 3     | PA         | 47,43 | 44           | 50            | 24             | 4               | 104,1537 | 8,3616  | 0,0000 | 12,4562 | 45,4350415 | 1,5914025 | 28,55031 |
| 6 months | 2         | 4     | PA         | 42,50 | 40           | 14            | 32             | 30              | 81,6755  | 7,2549  | 0,0000 | 11,2579 | 44,8225305 | 1,5806195 | 28,35757 |
| 6 months | 2         | 1     | PC         | 43,40 | 100          | 12            | 10             | 18              | 107,1956 | 7,3322  | 0,0063 | 14,6199 | 50,0900475 | 0,8018915 | 62,46487 |
| 6 months | 2         | 2     | PC         | 40,76 | 58           | 10            | 0              | 4               | 117,6480 | 8,2305  | 0,0105 | 14,2941 | 49,3384895 | 0,846859  | 58,26057 |
| 6 months | 2         | 3     | PC         | 44,52 | 80           | 24            | 18             | 4               | 125,2117 | 7,7143  | 0,0034 | 16,2311 | 49,492348  | 0,935571  | 52,99069 |
| 6 months | 2         | 1     | PV         | 42,86 | 16           | 2             | 6              | 4               | 82,5981  | 6,6858  | 0,0053 | 12,3543 | 49,3310715 | 0,804703  | 61,30345 |
| 6 months | 2         | 2     | PV         | 35,63 | 132          | 18            | 10             | 18              | 89,9368  | 6,2222  | 0,0069 | 14,4542 | 49,111849  | 1,070665  | 45,87042 |
| 6 months | 2         | 3     | PV         | 41,31 | 124          | 74            | 26             | 10              | 95,1999  | 7,0063  | 0,0075 | 13,5877 | 49,24704   | 1,2489125 | 39,43194 |
| 6 months | 2         | 4     | PV         | 38,41 | 66           | 58            | 14             | 20              | 65,9041  | 5,2071  | 0,0044 | 12,6566 | 49,309162  | 0,8722525 | 56,53083 |
| 6 months | 2         | 1     | PM         | 39,11 | 108          | 14            | 26             | 42              | 107,9781 | 6,9210  | 0,0043 | 15,6015 | 47,4060325 | 0,9314055 | 50,89731 |
| 6 months | 2         | 2     | PM         | 37,15 | 44           | 26            | 8              | 36              | 105,5326 | 6,7777  | 0,0018 | 15,5706 | 48,308794  | 0,975819  | 49,5059  |
| 6 months | 2         | 3     | PM         | 45,48 | 68           | 6             | 20             | 6               | 101,6578 | 7,3070  | 0,0046 | 13,9125 | 47,7374955 | 1,1261365 | 42,39051 |
| 6 months | 2         | 4     | PM         | 40,91 | 10           | 20            | 2              | 4               | 72,9804  | 5,1276  | 0,0061 | 14,2330 | 47,714367  | 0,974802  | 48,94775 |
| 6 months | 2         | 1     | GA         | 46,03 | 42           | 114           | 42             | 42              | 122,3221 | 11,7956 | 0,0000 | 10,3702 | 45,1615925 | 1,388897  | 32,51616 |
| 6 months | 2         | 2     | GA         | 47,97 | 62           | 26            | 14             | 22              | 125,6293 | 10,4382 | 0,0000 | 12,0355 | 45,428089  | 1,373752  | 33,06862 |
| 6 months | 2         | 3     | GA         | 45,77 | 70           | 52            | 18             | 20              | 89,6495  | 9,9809  | 0,0096 | 8,9821  | 44,631798  | 1,5000565 | 29,75341 |
| 6 months | 2         | 1     | GC         | 42,71 | 190          | 16            | 6              | 24              | 96,8333  | 7,4755  | 0,0049 | 12,9534 | 49,773628  | 0,9186585 | 54,18077 |
| 6 months | 2         | 2     | GC         | 54,08 | 38           | 38            | 2              | 32              | 127,2667 | 7,9849  | 0,0047 | 15,9385 | 48,421356  | 0,968458  | 49,99841 |
| 6 months | 2         | 3     | GC         | 49,50 | 56           | 22            | 10             | 12              | 132,2394 | 9,6287  | 0,0050 | 13,7338 | 48,6891045 | 0,844225  | 57,67314 |
| 6 months | 2         | 1     | GV         | 42,56 | 70           | 26            | 4              | 20              | 76,6706  | 7,1511  | 0,0068 | 10,7216 | 49,014652  | 0,92147   | 53,1918  |
| 6 months | 2         | 2     | GV         | 46,19 | 48           | 6             | 8              | 16              | 146,0185 | 9,6307  | 0,0019 | 15,1617 | 48,1947155 | 1,192264  | 40,42286 |
| 6 months | 2         | 3     | GV         | 39,80 | 10           | 10            | 6              | 0               | 98,7586  | 7,6628  | 0,0020 | 12,8880 | 48,4437965 | 1,1575665 | 41,84969 |

|          |   |   |      |       |     |     |    |    |          |         |        |         |            |            |           |
|----------|---|---|------|-------|-----|-----|----|----|----------|---------|--------|---------|------------|------------|-----------|
| 6 months | 2 | 4 | GV   | 42,31 | 60  | 20  | 26 | 14 | 94,4866  | 7,4743  | 0,0044 | 12,6415 | 48,740587  | 0,8427385  | 57,83596  |
| 6 months | 2 | 1 | GM   | 45,76 | 116 | 24  | 2  | 20 | 119,5807 | 9,4706  | 0,0040 | 12,6265 | 47,089613  | 1,0481725  | 44,92544  |
| 6 months | 2 | 2 | GM   | 38,41 | 58  | 44  | 16 | 40 | 98,3231  | 6,8589  | 0,0017 | 14,3351 | 47,3916605 | 1,097418   | 43,18469  |
| 6 months | 2 | 3 | GM   | 42,01 | 32  | 12  | 14 | 16 | 114,9711 | 8,2447  | 0,0038 | 13,9449 | 46,934252  | 1,0347905  | 45,35628  |
| 6 months | 2 | 1 | AC   | 43,26 | 106 | 84  | 14 | 42 | 90,8808  | 9,1434  | 0,0085 | 9,9395  | 46,7493495 | 1,2178065  | 38,38816  |
| 6 months | 2 | 2 | AC   | 42,57 | 64  | 28  | 18 | 26 | 73,8590  | 5,9653  | 0,0215 | 12,3815 | 46,344379  | 0,999568   | 46,36441  |
| 6 months | 2 | 3 | AC   | 55,74 | 22  | 48  | 8  | 12 | 123,8083 | 12,9555 | 0,0000 | 9,5564  | 45,8525145 | 1,2830635  | 35,73675  |
| 6 months | 2 | 1 | AV   | 42,01 | 64  | 34  | 14 | 52 | 99,7509  | 10,1693 | 0,0000 | 9,8091  | 45,9903735 | 1,220618   | 37,67794  |
| 6 months | 2 | 2 | AV   | 45,64 | 14  | 12  | 2  | 18 | 110,5130 | 8,5518  | 0,0000 | 12,9227 | 46,1177385 | 1,223374   | 37,69717  |
| 6 months | 2 | 3 | AV   | 48,56 | 26  | 72  | 18 | 10 | 107,4440 | 11,1199 | 0,0000 | 9,6623  | 45,6072065 | 1,596405   | 28,56869  |
| 6 months | 2 | 4 | AV   | 40,76 | 28  | 6   | 14 | 12 | 92,0803  | 9,9697  | 0,0000 | 9,2360  | 44,7553995 | 1,502886   | 29,77964  |
| 6 months | 2 | 1 | AM   | 43,69 | 100 | 42  | 24 | 46 | 102,2721 | 7,7996  | 0,0081 | 13,1124 | 44,0653345 | 1,3473205  | 32,7059   |
| 6 months | 2 | 2 | AM   | 44,38 | 40  | 40  | 16 | 22 | 97,0872  | 8,5746  | 0,0036 | 11,3226 | 45,3146835 | 1,128528   | 40,1538   |
| 6 months | 2 | 3 | AM   | 44,66 | 86  | 14  | 24 | 32 | 105,7132 | 10,2516 | 0,0000 | 10,3118 | 44,097662  | 1,473629   | 29,92453  |
| 6 months | 2 | 2 | CV   | 41,60 | 112 | 34  | 2  | 22 | 111,3507 | 7,9659  | 0,0047 | 13,9785 | 49,1110055 | 0,81808    | 60,03203  |
| 6 months | 2 | 3 | CV   | 39,79 | 40  | 34  | 16 | 16 | 107,4496 | 8,4204  | 0,0048 | 12,7606 | 49,664513  | 0,9405735  | 52,80237  |
| 6 months | 2 | 4 | CV   | 42,99 | 30  | 6   | 8  | 0  | 94,0188  | 6,9133  | 0,0053 | 13,5997 | 49,8756465 | 0,7758205  | 64,28761  |
| 6 months | 2 | 1 | CM   | 41,17 | 76  | 26  | 14 | 28 | 84,7877  | 6,2702  | 0,0058 | 13,5224 | 48,67737   | 0,877082   | 55,49922  |
| 6 months | 2 | 2 | CM   | 44,10 | 52  | 32  | 10 | 16 | 75,4756  | 6,1584  | 0,0059 | 12,2556 | 48,3079505 | 0,723234   | 66,79436  |
| 6 months | 2 | 3 | CM   | 44,52 | 84  | 14  | 6  | 8  | 75,3917  | 6,4088  | 0,0026 | 11,7639 | 48,1549685 | 0,8177975  | 58,88373  |
| 6 months | 2 | 1 | VM   | 39,51 | 100 | 50  | 16 | 28 | 106,1839 | 7,2288  | 0,0043 | 14,6889 | 47,918394  | 0,8798935  | 54,45931  |
| 6 months | 2 | 2 | VM   | 43,12 | 10  | 32  | 6  | 10 | 76,1335  | 5,0821  | 0,0032 | 14,9807 | 48,08131   | 0,94704    | 50,77009  |
| 6 months | 2 | 3 | VM   | 39,67 | 46  | 16  | 6  | 2  | 130,1375 | 8,6746  | 0,0013 | 15,0021 | 47,9096605 | 1,131139   | 42,35524  |
| 6 months | 2 | 4 | VM   | 38,69 | 40  | 28  | 10 | 4  | 97,8557  | 6,3492  | 0,0036 | 15,4122 | 47,647236  | 0,8970685  | 53,11438  |
| 6 months | 4 | 1 | PGAC | 46,03 | 32  | 36  | 10 | 4  | 110,7919 | 8,3250  | 0,0045 | 13,3083 | 47,62582   | 1,09539425 | 43,47825  |
| 6 months | 4 | 2 | PGAC | 45,45 | 172 | 40  | 20 | 8  | 89,7162  | 6,8972  | 0,0042 | 13,0077 | 47,3832893 | 1,1103055  | 42,6759   |
| 6 months | 4 | 3 | PGAC | 46,87 | 42  | 46  | 32 | 26 | 134,4515 | 8,4107  | 0,0084 | 15,9858 | 47,062073  | 1,21781375 | 38,64472  |
| 6 months | 4 | 4 | PGAC | 39,53 | 20  | 28  | 36 | 34 | 83,6225  | 7,8303  | 0,0004 | 10,6793 | 47,0983665 | 1,20232975 | 39,17259  |
| 6 months | 4 | 1 | PGAV | 45,10 | 30  | 14  | 8  | 20 | 99,9570  | 7,0032  | 0,0013 | 14,2730 | 47,246332  | 1,0968     | 43,07652  |
| 6 months | 4 | 2 | PGAV | 39,94 | 100 | 14  | 14 | 30 | 106,3897 | 8,7103  | 0,0011 | 12,2142 | 47,269969  | 1,2222085  | 38,67586  |
| 6 months | 4 | 3 | PGAV | 47,00 | 54  | 18  | 30 | 14 | 132,6853 | 10,3179 | 0,0050 | 12,8598 | 46,939419  | 1,3744845  | 34,15056  |
| 6 months | 4 | 4 | PGAV | 43,97 | 32  | 32  | 8  | 16 | 141,3329 | 10,1003 | 0,0007 | 13,9929 | 46,7815588 | 1,211679   | 38,60887  |
| 6 months | 4 | 2 | PGAM | 40,62 | 62  | 28  | 0  | 14 | 95,7062  | 7,0050  | 0,0003 | 13,6626 | 46,8684415 | 1,1747855  | 39,89532  |
| 6 months | 4 | 3 | PGAM | 42,29 | 62  | 62  | 72 | 64 | 86,4958  | 8,5815  | 0,0019 | 10,0794 | 46,1846468 | 1,3130965  | 35,17232  |
| 6 months | 4 | 4 | PGAM | 43,46 | 68  | 48  | 16 | 16 | 103,6561 | 6,7599  | 0,0052 | 15,3339 | 45,9841613 | 1,26295375 | 36,41001  |
| 6 months | 4 | 1 | PGCV | 42,15 | 98  | 20  | 8  | 36 | 100,8681 | 7,0527  | 0,0063 | 14,3021 | 49,5523498 | 0,86168075 | 57,50662  |
| 6 months | 4 | 2 | PGCV | 50,61 | 78  | 46  | 14 | 20 | 129,1981 | 8,0189  | 0,0065 | 16,1117 | 48,7666025 | 1,0195615  | 47,83096  |
| 6 months | 4 | 3 | PGCV | 47,56 | 4   | 4   | 0  | 2  | 99,5325  | 7,3952  | 0,0053 | 13,4590 | 48,9680723 | 1,04656875 | 46,78916  |
| 6 months | 4 | 4 | PGCV | 54,64 | 22  | 10  | 0  | 34 | 73,4231  | 4,7553  | 0,0164 | 15,4404 | 49,3416823 | 0,84814625 | 58,17591  |
| 6 months | 4 | 1 | PGCM | 42,57 | 94  | 10  | 30 | 24 | 52,5946  | 5,2480  | 0,0046 | 10,0217 | 48,5898303 | 0,925032   | 52,52773  |
| 6 months | 4 | 2 | PGCM | 44,93 | 58  | 24  | 6  | 12 | 86,1923  | 5,2364  | 0,0041 | 16,4601 | 48,365075  | 0,9721385  | 49,75122  |
| 6 months | 4 | 3 | PGCM | 42,62 | 68  | 22  | 44 | 8  | 84,0081  | 6,8826  | 0,0068 | 12,2058 | 48,2133    | 0,98518075 | 48,93853  |
| 6 months | 4 | 4 | PGCM | 37,24 | 64  | 62  | 12 | 40 | 110,7332 | 51,7453 | 0,0000 | 2,1400  | 48,5442848 | 0,899421   | 53,067282 |
| 6 months | 4 | 1 | PGVM | 42,29 | 132 | 104 | 12 | 32 | 88,0436  | 7,7962  | 0,0015 | 11,2932 | 48,2103423 | 0,92643775 | 52,0384   |
| 6 months | 4 | 2 | PGVM | 41,86 | 166 | 18  | 6  | 40 | 94,1381  | 7,1445  | 0,0046 | 13,1764 | 48,2517548 | 1,0840415  | 44,51098  |
| 6 months | 4 | 3 | PGVM | 45,47 | 52  | 24  | 46 | 40 | 95,8897  | 7,6093  | 0,0025 | 12,6017 | 48,090646  | 1,1418515  | 42,11638  |
| 6 months | 4 | 4 | PGVM | 42,01 | 62  | 32  | 8  | 26 | 88,4024  | 6,9190  | 0,0030 | 12,7767 | 48,227477  | 0,90877025 | 53,06894  |
| 6 months | 4 | 1 | PACV | 45,35 | 134 | 34  | 10 | 18 | 122,0811 | 10,0135 | 0,0055 | 12,1916 | 47,246332  | 1,0968     | 43,07652  |
| 6 months | 4 | 2 | PACV | 46,45 | 110 | 24  | 12 | 38 | 100,0649 | 7,3593  | 0,0056 | 13,5970 | 47,269969  | 1,2222085  | 38,67586  |
| 6 months | 4 | 3 | PACV | 44,10 | 62  | 12  | 30 | 20 | 119,4160 | 10,9446 | 0,0012 | 10,9109 | 46,939419  | 1,3744845  | 34,15056  |
| 6 months | 4 | 4 | PACV | 47,98 | 66  | 54  | 30 | 54 | 160,1359 | 9,3592  | 0,0032 | 17,1101 | 46,7815588 | 1,211679   | 38,60887  |
| 6 months | 4 | 1 | PACM | 42,31 | 66  | 26  | 4  | 16 | 91,7155  | 6,3372  | 0,0065 | 14,4726 | 47,077691  | 1,074606   | 43,80926  |
| 6 months | 4 | 2 | PACM | 41,20 | 42  | 22  | 4  | 30 | 96,1633  | 5,9056  | 0,0204 | 16,2833 | 47,3265865 | 0,9876935  | 47,91627  |

|           |   |   |      |       |     |     |    |    |          |         |         |         |            |            |          |
|-----------|---|---|------|-------|-----|-----|----|----|----------|---------|---------|---------|------------|------------|----------|
| 6 months  | 4 | 3 | PACM | 47,55 | 42  | 10  | 8  | 6  | 92,7620  | 6,9594  | 0,0063  | 13,3291 | 46,795005  | 1,2046     | 38,84692 |
| 6 months  | 4 | 4 | PACM | 40,05 | 22  | 14  | 14 | 16 | 117,7666 | 8,6271  | 0,0041  | 13,6508 | 46,551691  | 1,22949475 | 37,86246 |
| 6 months  | 4 | 1 | PAVM | 49,94 | 32  | 28  | 14 | 18 | 90,7812  | 7,3593  | 0,0045  | 12,3355 | 46,698203  | 1,07601175 | 43,39934 |
| 6 months  | 4 | 2 | PAVM | 43,97 | 28  | 28  | 12 | 12 | 126,7833 | 8,0413  | 0,0017  | 15,7666 | 47,2132663 | 1,0995965  | 42,9369  |
| 6 months  | 4 | 2 | PAVM | 42,31 | 34  | 30  | 6  | 10 | 105,0309 | 8,7222  | 0,0049  | 12,0418 | 46,672351  | 1,36127075 | 34,28587 |
| 6 months  | 4 | 4 | PAVM | 41,05 | 32  | 60  | 24 | 26 | 107,6467 | 8,9487  | 0,0022  | 12,0293 | 46,2348833 | 1,238844   | 37,32099 |
| 6 months  | 4 | 1 | PCVM | 46,19 | 38  | 34  | 30 | 40 | 98,1478  | 8,7158  | 0,0029  | 11,2610 | 49,0042208 | 0,8408925  | 58,27644 |
| 6 months  | 4 | 2 | PCVM | 40,91 | 26  | 12  | 0  | 8  | 98,8207  | 6,6018  | 0,0038  | 14,9689 | 48,7098998 | 0,8969495  | 54,30618 |
| 6 months  | 4 | 3 | PCVM | 42,99 | 54  | 40  | 16 | 18 | 110,7844 | 7,5048  | 0,0048  | 14,7619 | 48,7010043 | 1,033355   | 47,12902 |
| 6 months  | 4 | 4 | PCVM | 41,60 | 34  | 32  | 0  | 14 | 98,4518  | 5,9988  | 0,0042  | 16,4120 | 48,7950068 | 0,87531125 | 55,74589 |
| 6 months  | 4 | 1 | GACV | 52,55 | 102 | 40  | 8  | 38 | 92,1893  | 6,8547  | 0,0060  | 13,4491 | 47,8820008 | 1,06963825 | 44,76467 |
| 6 months  | 4 | 2 | GACV | 48,26 | 80  | 46  | 26 | 32 | 71,4833  | 6,4790  | 0,0027  | 11,0330 | 47,2695473 | 1,095916   | 43,13245 |
| 6 months  | 4 | 3 | GACV | 53,26 | 86  | 66  | 22 | 16 | 93,5283  | 7,7581  | 0,0053  | 12,0555 | 47,1481555 | 1,220315   | 38,63605 |
| 6 months  | 4 | 4 | GACV | 44,23 | 26  | 16  | 22 | 20 | 131,9321 | 11,6759 | 0,0107  | 11,2996 | 47,064801  | 1,163463   | 40,45234 |
| 6 months  | 4 | 1 | GACM | 51,30 | 134 | 64  | 8  | 38 | 70,6095  | 6,5174  | 0,0073  | 10,8340 | 46,8680198 | 1,048493   | 44,70036 |
| 6 months  | 4 | 2 | GACM | 44,11 | 58  | 10  | 0  | 16 | 85,3421  | 7,2484  | 0,0000  | 11,7739 | 46,3933833 | 1,158927   | 40,03132 |
| 6 months  | 4 | 3 | GACM | 51,73 | 58  | 12  | 14 | 6  | 119,8813 | 11,2739 | 0,0001  | 10,6336 | 46,2674035 | 1,21473775 | 38,08839 |
| 6 months  | 4 | 1 | GAVM | 45,50 | 56  | 42  | 26 | 46 | 103,5194 | 8,8639  | 0,0050  | 11,6788 | 46,5399933 | 1,13439525 | 41,02626 |
| 6 months  | 4 | 2 | GAVM | 48,68 | 16  | 18  | 2  | 2  | 101,2582 | 8,6127  | 0,0018  | 11,7569 | 46,7546995 | 1,160396   | 40,29202 |
| 6 months  | 4 | 3 | GAVM | 43,42 | 72  | 20  | 18 | 10 | 138,2529 | 11,4669 | 0,0000  | 12,0567 | 46,2707293 | 1,31559775 | 35,17088 |
| 6 months  | 4 | 4 | GAVM | 46,31 | 18  | 60  | 26 | 6  | 140,3522 | 9,3019  | 0,0021  | 15,0885 | 45,9505958 | 1,224087   | 37,53867 |
| 6 months  | 4 | 1 | GCVM | 41,04 | 56  | 18  | 0  | 16 | 93,9380  | 8,7627  | 0,0098  | 10,7202 | 48,846011  | 0,899276   | 54,31704 |
| 6 months  | 4 | 2 | GCVM | 44,92 | 66  | 40  | 12 | 8  | 109,7982 | 7,6563  | 0,0022  | 14,3408 | 48,251333  | 0,957749   | 50,37994 |
| 6 months  | 4 | 3 | GCVM | 41,19 | 74  | 32  | 32 | 32 | 115,1705 | 9,1050  | 0,0059  | 12,6491 | 48,2993825 | 0,987682   | 48,90175 |
| 6 months  | 4 | 4 | GCVM | 46,31 | 40  | 40  | 6  | 16 | 103,1588 | 6,5416  | 0,0000  | 15,7696 | 48,5107193 | 0,86055425 | 56,37148 |
| 6 months  | 4 | 1 | ACVM | 47,68 | 28  | 12  | 6  | 10 | 75,1851  | 8,6974  | 0,0015  | 8,6446  | 47,3338718 | 1,04885    | 45,12931 |
| 6 months  | 4 | 3 | ACVM | 46,73 | 100 | 32  | 24 | 14 | 98,1635  | 7,8193  | 0,0039  | 12,5540 | 47,2128445 | 0,973304   | 48,50781 |
| 6 months  | 4 | 3 | ACVM | 44,38 | 48  | 28  | 46 | 14 | 88,1036  | 7,4665  | 0,0079  | 11,7998 | 46,8810875 | 1,20710125 | 38,83774 |
| 6 months  | 4 | 4 | ACVM | 45,06 | 26  | 16  | 28 | 20 | 87,2977  | 7,7166  | 0,0032  | 11,3130 | 46,5181255 | 1,190628   | 39,07024 |
| 12 months | 1 | 1 | P    | 62,90 | 140 | 14  | 6  | 24 | 227,7110 | 15,2443 | 0,0154  | 14,9374 | 47,809055  | 1,328671   | 35,98261 |
| 12 months | 1 | 2 | P    | 62,92 | 58  | 8   | 6  | 10 | 332,6587 | 19,1576 | 0,0550  | 17,3643 | 48,560013  | 1,169437   | 41,52427 |
| 12 months | 1 | 3 | P    | 52,04 | 64  | 24  | 2  | 16 | 199,9408 | 9,9331  | 0,0009  | 20,1288 | 48,164043  | 1,334355   | 36,09537 |
| 12 months | 1 | 4 | P    | 54,03 | 56  | 10  | 14 | 4  | 283,3857 | 15,6018 | 0,0084  | 18,1637 | 47,981323  | 1,094235   | 43,84919 |
| 12 months | 1 | 1 | G    | 59,04 | 172 | 84  | 16 | 50 | 108,7621 | 13,4921 | 0,0449  | 8,0612  | 46,835678  | 1,376157   | 34,03367 |
| 12 months | 1 | 2 | G    | 54,75 | 40  | 16  | 6  | 0  | 270,1823 | 18,3983 | 0,0207  | 14,6852 | 49,544209  | 1,424384   | 34,7829  |
| 12 months | 1 | 3 | G    | 59,51 | 80  | 124 | 18 | 12 | 178,1733 | 10,9507 | 0,0108  | 16,2705 | 46,951397  | 1,199822   | 39,13197 |
| 12 months | 1 | 1 | A    | 46,67 | 164 | 140 | 30 | 18 | 155,3828 | 29,1968 | 0,0452  | 5,3219  | 42,408607  | 1,654239   | 25,63632 |
| 12 months | 1 | 2 | A    | 43,21 | 60  | 80  | 24 | 2  | 123,5496 | 21,9656 | 0,1059  | 5,6247  | 42,980858  | 1,496193   | 28,72681 |
| 12 months | 1 | 3 | A    | 59,76 | 56  | 76  | 4  | 8  | 582,8309 | 47,9980 | 0,0258  | 12,1428 | 41,898041  | 2,285372   | 18,33314 |
| 12 months | 1 | 1 | C    | 56,82 | 64  | 16  | 8  | 4  | 169,7293 | 23,1463 | -0,0035 | 7,3329  | 49,066624  | 0,711896   | 68,92387 |
| 12 months | 1 | 2 | C    | 47,95 | 60  | 20  | 0  | 0  | 173,8224 | 23,0025 | -0,0081 | 7,5567  | 48,88826   | 0,763915   | 63,99699 |
| 12 months | 1 | 3 | C    | 62,55 | 272 | 176 | 40 | 26 | 141,7073 | 22,2575 | -0,0079 | 6,3667  | 49,50312   | 0,715545   | 69,1824  |
| 12 months | 1 | 1 | V    | 50,26 | 74  | 56  | 6  | 24 | 112,3958 | 7,4104  | 0,0043  | 15,1672 | 49,53664   | 1,079651   | 45,88209 |
| 12 months | 1 | 2 | V    | 50,47 | 166 | 38  | 38 | 22 | 232,1535 | 16,1760 | 0,0030  | 14,3518 | 49,991589  | 1,116135   | 44,78991 |
| 12 months | 1 | 3 | V    | 55,68 | 146 | 58  | 20 | 18 | 323,4665 | 8,6018  | -0,0004 | 37,6044 | 49,298641  | 1,036091   | 47,58138 |
| 12 months | 1 | 4 | V    | 49,31 | 38  | 28  | 0  | 6  | 187,1569 | 34,9929 | -0,0060 | 5,3484  | 49,379135  | 1,086113   | 45,46409 |
| 12 months | 1 | 1 | M    | 45,08 | 184 | 48  | 10 | 4  | 133,2724 | 8,2568  | -0,0046 | 16,1409 | 45,90731   | 1,032137   | 44,47792 |
| 12 months | 1 | 2 | M    | 46,20 | 76  | 100 | 14 | 2  | 134,5101 | 18,6017 | 0,0293  | 7,2310  | 46,377983  | 1,027826   | 45,12241 |
| 12 months | 1 | 3 | M    | 53,86 | 60  | 88  | 18 | 6  | 190,4329 | 11,8514 | 0,0257  | 16,0684 | 45,437653  | 0,988101   | 45,98483 |
| 12 months | 2 | 1 | PG   | 63,99 | 182 | 44  | 16 | 14 | 186,8789 | 21,1181 | 0,0377  | 8,8492  | 47,3223665 | 1,352414   | 34,99104 |
| 12 months | 2 | 2 | PG   | 60,07 | 48  | 42  | 12 | 2  | 542,8241 | 43,8582 | 0,0379  | 12,3768 | 49,052111  | 1,2969105  | 37,82228 |
| 12 months | 2 | 3 | PG   | 58,76 | 202 | 34  | 44 | 70 | 183,4589 | 12,7485 | 0,0127  | 14,3907 | 47,55772   | 1,2670885  | 37,53307 |
| 12 months | 2 | 1 | PA   | 51,49 | 268 | 92  | 48 | 18 | 158,2733 | 11,9009 | 0,0309  | 13,2993 | 45,108831  | 1,491455   | 30,24485 |

|           |   |   |      |       |     |     |    |    |          |         |         |         |            |            |          |
|-----------|---|---|------|-------|-----|-----|----|----|----------|---------|---------|---------|------------|------------|----------|
| 12 months | 2 | 2 | PA   | 53,16 | 82  | 18  | 4  | 16 | 172,4296 | 11,0390 | 0,0101  | 15,6200 | 45,7704355 | 1,332815   | 34,34118 |
| 12 months | 2 | 3 | PA   | 57,68 | 166 | 60  | 32 | 36 | 398,7255 | 24,3868 | 0,0258  | 16,3500 | 45,031042  | 1,8098635  | 24,88091 |
| 12 months | 2 | 4 | PA   | 58,53 | 74  | 16  |    | 32 | 366,3067 | 18,6633 | 0,0068  | 19,6271 | 45,68787   | 1,36809    | 33,39537 |
| 12 months | 2 | 1 | PC   | 50,15 | 166 | 64  |    | 44 | 323,1253 | 14,3375 | 0,0232  | 22,5371 | 48,4378395 | 1,0202835  | 47,47488 |
| 12 months | 2 | 2 | PC   | 58,61 | 138 | 18  |    | 12 | 185,5294 | 18,3983 | 0,0445  | 10,0840 | 48,7241365 | 0,966676   | 50,40379 |
| 12 months | 2 | 3 | PC   | 47,82 | 36  | 6   |    | 0  | 430,3704 | 13,7987 | 0,0145  | 31,1891 | 48,8335815 | 1,02495    | 47,64484 |
| 12 months | 2 | 1 | PV   | 56,44 | 14  | 2   |    | 8  | 127,9167 | 7,8027  | 0,0023  | 16,3940 | 48,6728475 | 1,204161   | 40,42055 |
| 12 months | 2 | 2 | PV   | 56,06 | 62  | 26  |    | 16 | 99,1970  | 6,3492  | -0,0005 | 15,6235 | 49,275801  | 1,142786   | 43,11901 |
| 12 months | 2 | 3 | PV   | 57,73 | 182 | 16  |    | 20 | 225,0352 | 12,8011 | 0,0004  | 17,5794 | 48,731342  | 1,185223   | 41,11576 |
| 12 months | 2 | 4 | PV   | 59,69 | 58  | 16  |    | 6  | 107,4961 | 4,6906  | -0,0046 | 22,9175 | 48,680229  | 1,090174   | 44,65363 |
| 12 months | 2 | 1 | PM   | 49,65 | 190 | 28  |    | 16 | 146,9961 | 13,4417 | 0,0195  | 10,9358 | 46,8581825 | 1,180404   | 39,69673 |
| 12 months | 2 | 2 | PM   | 58,45 | 80  | 28  |    | 12 | 239,0430 | 17,1718 | 0,0109  | 13,9207 | 47,468998  | 1,0986315  | 43,20739 |
| 12 months | 2 | 3 | PM   | 57,69 | 48  | 8   |    | 8  | 509,7032 | 40,6197 | 0,0202  | 12,5482 | 46,800848  | 1,161228   | 40,30289 |
| 12 months | 2 | 4 | PM   | 52,64 | 54  | 24  |    | 6  | 303,7629 | 20,9020 | 0,0545  | 14,5327 | 47,157091  | 1,0998305  | 42,87669 |
| 12 months | 2 | 1 | GA   | 48,90 | 196 | 192 |    | 42 | 78,7388  | 6,7844  | 0,0043  | 11,6059 | 44,6221425 | 1,515198   | 29,44971 |
| 12 months | 2 | 2 | GA   | 54,47 | 48  | 48  |    | 10 | 82,6993  | 8,3726  | 0,0244  | 9,8774  | 46,2625335 | 1,4602885  | 31,68041 |
| 12 months | 2 | 3 | GA   | 53,94 | 108 | 140 |    | 8  | 73,9922  | 7,3593  | 0,0107  | 10,0542 | 44,424719  | 1,742597   | 25,4934  |
| 12 months | 2 | 1 | GC   | 46,28 | 128 | 0   |    | 0  | 139,3357 | 8,7459  | 0,0020  | 15,9316 | 47,951151  | 1,0440265  | 45,92906 |
| 12 months | 2 | 2 | GC   | 57,06 | 116 | 68  |    | 10 | 109,3963 | 5,7823  | -0,0041 | 18,9191 | 49,2162345 | 1,0941495  | 44,98127 |
| 12 months | 2 | 3 | GC   | 52,61 | 56  | 44  |    | 24 | 112,0754 | 7,0387  | 0,0006  | 15,9228 | 48,2272585 | 0,9576835  | 50,35824 |
| 12 months | 2 | 1 | GV   | 48,60 | 78  | 20  |    | 8  | 113,2169 | 6,8660  | 0,0034  | 16,4896 | 48,186159  | 1,227904   | 39,24261 |
| 12 months | 2 | 2 | GV   | 57,07 | 198 | 42  |    | 48 | 113,6693 | 8,6144  | 0,0028  | 13,1952 | 49,767899  | 1,2702595  | 39,17932 |
| 12 months | 2 | 3 | GV   | 52,66 | 36  | 6   |    | 6  | 263,8762 | 6,8227  | 0,0087  | 38,6761 | 48,125019  | 1,1179565  | 43,04731 |
| 12 months | 2 | 4 | GV   | 52,21 | 52  | 20  |    | 8  | 564,7423 | 16,3878 | 0,0168  | 34,4612 | 48,5974235 | 1,079735   | 45,00866 |
| 12 months | 2 | 1 | GM   | 54,70 | 200 | 136 |    | 50 | 86,0311  | 6,5847  | 0,0018  | 13,0654 | 46,371494  | 1,204147   | 38,50983 |
| 12 months | 2 | 2 | GM   | 50,90 | 152 | 80  |    | 18 | 84,0236  | 5,8769  | -0,0034 | 14,2973 | 47,961096  | 1,226105   | 39,11663 |
| 12 months | 2 | 3 | GM   | 52,08 | 60  | 52  |    | 14 | 118,5714 | 5,1515  | 0,0126  | 23,0167 | 46,194525  | 1,0939615  | 42,22683 |
| 12 months | 2 | 1 | AC   | 53,38 | 108 | 76  |    | 24 | 212,5202 | 13,2349 | 0,0106  | 16,0575 | 45,7376155 | 1,1830675  | 38,66019 |
| 12 months | 2 | 2 | AC   | 76,54 | 160 | 80  |    | 20 | 223,1183 | 14,4813 | 0,0159  | 15,4074 | 45,934559  | 1,130054   | 40,64811 |
| 12 months | 2 | 3 | AC   | 46,09 | 24  | 156 |    | 14 | 306,6045 | 12,4120 | 0,0072  | 24,7022 | 45,7005805 | 1,5004585  | 30,45774 |
| 12 months | 2 | 1 | AV   | 46,70 | 70  | 44  |    | 32 | 110,3775 | 7,0602  | 0,0057  | 15,6338 | 45,9726235 | 1,366945   | 33,63166 |
| 12 months | 2 | 2 | AV   | 48,60 | 108 | 16  |    | 2  | 115,7924 | 9,7166  | -0,0075 | 11,9169 | 46,4862235 | 1,306164   | 35,58988 |
| 12 months | 2 | 3 | AV   | 67,63 | 6   | 24  |    | 8  | 108,2441 | 10,7591 | -0,0128 | 10,0607 | 45,598341  | 1,6607315  | 27,45678 |
| 12 months | 2 | 4 | AV   | 49,68 | 78  | 22  |    | 0  | 98,5625  | 15,5006 | -0,0366 | 6,3586  | 46,386776  | 1,364029   | 34,00718 |
| 12 months | 2 | 1 | AM   | 51,98 | 92  | 44  |    | 6  | 89,6605  | 7,9045  | 0,0006  | 11,3430 | 44,1579585 | 1,343188   | 32,87549 |
| 12 months | 2 | 2 | AM   | 53,57 | 52  | 16  |    | 2  | 127,5741 | 9,3218  | 0,0025  | 13,6855 | 44,6794205 | 1,2620095  | 35,40339 |
| 12 months | 2 | 3 | AM   | 57,48 | 16  | 92  |    | 10 | 112,8599 | 9,9490  | 0,0069  | 11,3439 | 43,667847  | 1,6367365  | 26,67983 |
| 12 months | 2 | 2 | CV   | 53,36 | 72  | 26  |    | 6  | 105,7364 | 8,0422  | 0,0068  | 13,1478 | 49,4399245 | 0,940025   | 52,59427 |
| 12 months | 2 | 3 | CV   | 58,24 | 116 | 68  |    | 56 | 207,9521 | 17,7009 | 0,0102  | 11,7481 | 49,4008805 | 0,875818   | 56,40542 |
| 12 months | 2 | 4 | CV   | 63,67 | 172 | 34  |    | 14 | 466,1271 | 11,3428 | 0,0184  | 41,0944 | 49,4438685 | 0,920928   | 53,68918 |
| 12 months | 2 | 1 | CM   | 51,90 | 124 | 136 |    | 16 | 298,2929 | 13,6078 | 0,0092  | 21,9207 | 47,486967  | 0,8720165  | 54,4565  |
| 12 months | 2 | 2 | CM   | 52,63 | 12  | 12  |    | 2  | 313,7008 | 11,8213 | 0,0064  | 26,5369 | 47,6331215 | 0,8958705  | 53,16965 |
| 12 months | 2 | 3 | CM   | 57,64 | 408 | 156 |    | 30 | 111,7857 | 6,8273  | 0,0068  | 16,3733 | 47,4703865 | 0,851823   | 55,72799 |
| 12 months | 2 | 1 | VM   | 55,29 | 116 | 52  |    | 22 | 138,1970 | 9,0342  | -0,0057 | 15,2971 | 47,721975  | 1,055894   | 45,1958  |
| 12 months | 2 | 2 | VM   | 53,72 | 90  | 44  |    | 18 | 95,7692  | 5,9913  | -0,0054 | 15,9848 | 48,184786  | 1,0719805  | 44,94931 |
| 12 months | 2 | 3 | VM   | 55,22 | 164 | 62  |    | 8  | 291,0220 | 15,4824 | 0,0006  | 18,7970 | 47,368147  | 1,012096   | 46,80203 |
| 12 months | 2 | 4 | VM   | 55,88 | 64  | 12  |    | 10 | 110,0440 | 88,2112 | 0,0004  | 1,2475  | 47,855997  | 1,0957695  | 43,67342 |
| 12 months | 4 | 1 | PGAC | 40,15 | 214 | 82  |    | 26 | 374,7029 | 13,7588 | 0,0178  | 27,2338 | 46,529991  | 1,26774075 | 36,70308 |
| 12 months | 4 | 2 | PGAC | 28,65 | 76  | 48  |    | 8  | 97,5137  | 7,3593  | 0,0063  | 13,2503 | 47,493335  | 1,21348225 | 39,13805 |
| 12 months | 4 | 3 | PGAC | 59,00 | 148 | 74  |    | 40 | 177,6132 | 7,2685  | 0,0011  | 24,4361 | 46,6291503 | 1,3837735  | 33,6971  |
| 12 months | 4 | 4 | PGAC | 36,98 | 90  | 52  |    | 18 | 93,5031  | 6,8142  | 0,0033  | 13,7218 | 47,1750135 | 1,14132    | 41,33373 |
| 12 months | 4 | 1 | PGAV | 51,15 | 92  | 24  |    | 2  | 217,1308 | 13,0884 | 0,0072  | 16,5895 | 46,647495  | 1,3596795  | 34,30771 |
| 12 months | 4 | 2 | PGAV | 51,23 | 148 | 42  |    | 8  | 305,7895 | 14,2539 | 0,0865  | 21,4531 | 47,7691673 | 1,30153725 | 36,70211 |

|           |   |   |      |       |     |     |    |    |          |         |         |         |            |            |          |
|-----------|---|---|------|-------|-----|-----|----|----|----------|---------|---------|---------|------------|------------|----------|
| 12 months | 4 | 3 | PGAV | 35,95 | 200 | 70  | 32 | 6  | 146,0185 | 12,6985 | 0,0077  | 11,4989 | 46,5780305 | 1,46391    | 31,81755 |
| 12 months | 4 | 4 | PGAV | 45,44 | 86  | 36  | 12 | 4  | 118,4948 | 7,4734  | 0,0013  | 15,8555 | 47,1426468 | 1,2239125  | 38,51799 |
| 12 months | 4 | 2 | PGAM | 53,88 | 40  | 18  | 12 | 16 | 134,5606 | 9,3664  | 0,0080  | 14,3663 | 46,8657658 | 1,27946    | 36,62933 |
| 12 months | 4 | 3 | PGAM | 48,13 | 20  | 40  | 4  | 4  | 135,8811 | 13,1609 | 0,0120  | 10,3246 | 45,6127835 | 1,4519125  | 31,41566 |
| 12 months | 4 | 4 | PGAM | 50,28 | 154 | 84  | 14 | 48 | 203,8976 | 18,5900 | 0,0180  | 10,9681 | 46,3810778 | 1,22874075 | 37,74684 |
| 12 months | 4 | 1 | PGCV | 41,54 | 146 | 48  | 16 | 8  | 130,4286 | 8,0427  | 0,0105  | 16,2170 | 48,3119993 | 1,12409375 | 42,97862 |
| 12 months | 4 | 2 | PGCV | 46,90 | 96  | 24  | 10 | 6  | 156,4484 | 7,0089  | 0,0019  | 22,3214 | 49,2460178 | 1,11846775 | 44,0299  |
| 12 months | 4 | 3 | PGCV | 45,44 | 78  | 58  | 6  | 6  | 65,3002  | 9,0049  | 0,0090  | 7,2516  | 48,4793003 | 1,07145325 | 45,2463  |
| 12 months | 4 | 4 | PGCV | 41,84 | 108 | 6   | 0  | 10 | 72,2117  | 7,5445  | 0,0004  | 9,5715  | 48,671193  | 1,002362   | 48,5565  |
| 12 months | 4 | 1 | PGCM | 58,13 | 180 | 32  | 12 | 38 | 101,2500 | 17,0683 | -0,0213 | 5,9320  | 47,4046668 | 1,11221525 | 42,62185 |
| 12 months | 4 | 2 | PGCM | 55,11 | 246 | 54  | 28 | 42 | 50,0441  | 5,3247  | 0,0084  | 9,3985  | 48,3426163 | 1,0963905  | 44,09252 |
| 12 months | 4 | 3 | PGCM | 49,86 | 208 | 58  | 14 | 22 | 226,8925 | 13,8245 | 0,0097  | 16,4123 | 47,5140533 | 1,05945575 | 44,84761 |
| 12 months | 4 | 4 | PGCM | 43,88 | 84  | 12  | 4  | 8  | 126,3564 | 6,7646  | -0,0115 | 18,6790 | 47,909624  | 1,00719025 | 47,5676  |
| 12 months | 4 | 1 | PGVM | 58,30 | 194 | 100 | 64 | 42 | 123,8566 | 9,2420  | 0,0039  | 13,4016 | 47,5221708 | 1,204154   | 39,46519 |
| 12 months | 4 | 2 | PGVM | 55,33 | 96  | 20  | 0  | 8  | 262,0862 | 13,1032 | 0,0297  | 20,0017 | 48,6184485 | 1,1844455  | 41,04743 |
| 12 months | 4 | 3 | PGVM | 54,57 | 130 | 34  | 8  | 8  | 104,7573 | 4,5013  | 0,0029  | 23,2725 | 47,4629335 | 1,13959225 | 41,64905 |
| 12 months | 4 | 4 | PGVM | 50,69 | 12  | 32  | 6  | 0  | 122,0588 | 11,3998 | 0,0362  | 10,7071 | 47,8772573 | 1,08978275 | 43,93285 |
| 12 months | 4 | 1 | PACV | 49,36 | 108 | 38  | 10 | 8  | 115,6002 | 8,5430  | 0,0061  | 13,5316 | 46,647495  | 1,3596795  | 34,30771 |
| 12 months | 4 | 2 | PACV | 49,78 | 114 | 0   | 10 | 10 | 133,3533 | 8,9489  | -0,0002 | 14,9016 | 47,7691673 | 1,30153725 | 36,70211 |
| 12 months | 4 | 3 | PACV | 68,35 | 34  | 38  | 14 | 4  | 210,9583 | 15,3166 | 0,0233  | 13,7732 | 46,5780305 | 1,46391    | 31,81755 |
| 12 months | 4 | 4 | PACV | 52,18 | 88  | 54  | 34 | 44 | 254,4345 | 11,2142 | 0,0295  | 22,6886 | 47,1426468 | 1,2239125  | 38,51799 |
| 12 months | 4 | 1 | PACM | 46,24 | 96  | 24  | 8  | 12 | 137,8813 | 10,6301 | 0,0081  | 12,9708 | 46,297899  | 1,18173575 | 39,17788 |
| 12 months | 4 | 2 | PACM | 57,40 | 248 | 38  | 6  | 16 | 82,8653  | 5,1850  | 0,0014  | 15,9818 | 46,7017785 | 1,11434275 | 41,90971 |
| 12 months | 4 | 3 | PACM | 57,85 | 62  | 26  | 14 | 16 | 305,2355 | 24,5311 | 0,0472  | 12,4428 | 46,2507143 | 1,33084325 | 34,75294 |
| 12 months | 4 | 4 | PACM | 36,27 | 6   | 0   | 12 | 2  | 140,4615 | 12,0014 | 0,0075  | 11,7038 | 46,8043003 | 1,14933725 | 40,72286 |
| 12 months | 4 | 1 | PAVM | 46,02 | 90  | 50  | 6  | 2  | 243,6919 | 19,2541 | 0,0108  | 12,6566 | 46,415403  | 1,2736745  | 36,44212 |
| 12 months | 4 | 2 | PAVM | 56,12 | 88  | 34  | 16 | 8  | 284,4479 | 13,0628 | 0,0218  | 21,7754 | 46,9776108 | 1,20239775 | 39,06994 |
| 12 months | 4 | 2 | PAVM | 39,39 | 142 | 58  | 26 | 12 | 104,0100 | 6,3910  | 0,0021  | 16,2745 | 46,1995945 | 1,41097975 | 32,74292 |
| 12 months | 4 | 4 | PAVM | 61,06 | 28  | 44  | 0  | 12 | 131,8992 | 5,2200  | 0,0085  | 25,2681 | 46,7719335 | 1,23192975 | 37,9664  |
| 12 months | 4 | 1 | PCVM | 57,50 | 52  | 12  | 12 | 0  | 104,3788 | 7,3593  | 0,0426  | 14,1832 | 48,0799073 | 1,03808875 | 46,3158  |
| 12 months | 4 | 2 | PCVM | 54,56 | 90  | 6   | 2  | 4  | 136,6995 | 8,7501  | 0,0028  | 15,6227 | 48,4544613 | 1,01932825 | 47,53568 |
| 12 months | 4 | 3 | PCVM | 58,76 | 26  | 4   | 10 | 2  | 127,2514 | 11,3439 | 0,0096  | 11,2176 | 48,1008643 | 1,018523   | 47,2261  |
| 12 months | 4 | 4 | PCVM | 51,96 | 62  | 8   | 6  | 4  | 183,7350 | 8,8689  | 0,0273  | 20,7167 | 48,3004798 | 1,01037925 | 47,80431 |
| 12 months | 4 | 1 | GACV | 48,62 | 108 | 56  | 16 | 6  | 565,5993 | 29,3104 | 0,0284  | 19,2969 | 46,9618873 | 1,20548575 | 38,95682 |
| 12 months | 4 | 2 | GACV | 47,07 | 54  | 46  | 18 | 6  | 66,5664  | 5,3120  | 0,0033  | 12,5313 | 47,851229  | 1,20015675 | 39,87082 |
| 12 months | 4 | 3 | GACV | 60,89 | 248 | 46  | 40 | 10 | 499,1957 | 34,7558 | 0,0252  | 14,3629 | 46,9127998 | 1,3092075  | 35,83298 |
| 12 months | 4 | 4 | GACV | 58,51 | 146 | 52  | 30 | 14 | 202,9074 | 24,9284 | 0,0329  | 8,1396  | 47,5244665 | 1,1392895  | 41,71413 |
| 12 months | 4 | 1 | GACM | 49,71 | 312 | 528 | 28 | 70 | 149,7816 | 15,3785 | 0,0115  | 9,7397  | 46,9478275 | 1,1780795  | 39,85115 |
| 12 months | 4 | 2 | GACM | 57,42 | 40  | 36  | 4  | 0  | 131,3585 | 9,2146  | 0,0022  | 14,2554 | 45,9475528 | 1,29721    | 35,42029 |
| 12 months | 4 | 3 | GACM | 58,63 | 256 | 224 | 34 | 78 | 174,5252 | 15,0182 | 0,0264  | 11,6209 | 46,7628975 | 1,14411775 | 40,87245 |
| 12 months | 4 | 1 | GAVM | 49,97 | 196 | 50  | 18 | 14 | 209,3694 | 10,6080 | 0,0065  | 19,7368 | 46,1720588 | 1,285546   | 35,9163  |
| 12 months | 4 | 2 | GAVM | 60,04 | 14  | 10  | 2  | 2  | 339,2460 | 13,3169 | 0,0127  | 25,4749 | 47,2236598 | 1,2661345  | 37,29751 |
| 12 months | 4 | 3 | GAVM | 38,28 | 98  | 10  | 10 | 6  | 150,6048 | 9,3179  | 0,0050  | 16,1630 | 45,896433  | 1,3773465  | 33,32236 |
| 12 months | 4 | 4 | GAVM | 57,88 | 114 | 14  | 6  | 20 | 233,0734 | 8,0102  | 0,0039  | 29,0972 | 46,7305308 | 1,22671025 | 38,09419 |
| 12 months | 4 | 1 | GCVM | 49,30 | 114 | 78  | 20 | 16 | 89,1330  | 6,6488  | 0,0108  | 13,4059 | 47,836563  | 1,04996025 | 45,56036 |
| 12 months | 4 | 2 | GCVM | 37,65 | 176 | 40  | 38 | 10 | 137,7196 | 7,3136  | 0,0110  | 18,8306 | 48,7005103 | 1,083065   | 44,96545 |
| 12 months | 4 | 3 | GCVM | 44,81 | 178 | 38  | 34 | 34 | 121,2063 | 6,6234  | 0,0038  | 18,2997 | 47,7977028 | 0,98488975 | 48,53102 |
| 12 months | 4 | 4 | GCVM | 48,50 | 134 | 50  | 18 | 20 | 120,8516 | 7,1895  | 0,0017  | 16,8095 | 48,259077  | 1,00515975 | 48,01135 |
| 12 months | 4 | 1 | ACVM | 54,38 | 56  | 20  | 14 | 10 | 192,4252 | 15,7093 | 0,0150  | 12,2491 | 46,7297953 | 1,11948075 | 41,74238 |
| 12 months | 4 | 3 | ACVM | 55,64 | 26  | 14  | 0  | 6  | 88,0896  | 5,3459  | 0,0002  | 16,4779 | 47,0596725 | 1,10101725 | 42,74199 |
| 12 months | 4 | 3 | ACVM | 54,29 | 164 | 70  | 40 | 34 | 214,9107 | 15,7700 | 0,0104  | 13,6278 | 46,5343638 | 1,25627725 | 37,04148 |
| 12 months | 4 | 4 | ACVM | 35,07 | 108 | 34  | 32 | 24 | 175,5322 | 15,3989 | 0,0233  | 11,3990 | 47,1537533 | 1,14730675 | 41,09952 |
